# Supplementary material for: Genome-Wide Association Study and Genomic Selection for Proteinogenic Methionine in Soybean Seeds
Source: Front Plant Sci. 2022 Apr 25;13:859109. doi: 10.3389/fpls.2022.859109 (PMC9088226; doi:10.3389/fpls.2022.859109)
Supplement: Supplementary file 1 [file Table_1.xlsx]

## Sheet: Sheet1
SNP	Chromosome	Position	p-value
ss715578536	1	1508766	0.000439
ss715578540	1	1516846	0.000361
ss715578543	1	1521991	0.000607
ss715578584	1	1653600	0.000309
ss715578777	1	244125	0.000259
ss715578935	1	28477581	0.000918
ss715580298	1	52743141	0.00055
ss715580351	1	5252546	0.000925
ss715581070	2	12374354	0.00084
ss715581073	2	12377902	0.000422
ss715581074	2	12380429	0.000422
ss715581133	2	1272176	0.000682
ss715581341	2	1541019	0.000279
ss715583635	2	562972	0.00083
ss715584036	2	8731107	0.000569
ss715584456	3	1395577	0.000947
ss715584520	3	1598413	0.000901
ss715585364	3	33758308	0.000118
ss715585365	3	33765404	5.17e-05
ss715585366	3	33767293	0.000294
ss715585373	3	33855100	0.000475
ss715585382	3	33914662	0.000142
ss715585392	3	33988654	0.000651
ss715586057	3	39303211	0.000174
ss715586063	3	39357229	0.000689
ss715586070	3	39403852	7.25e-05
ss715586075	3	39426292	0.000195
ss715586081	3	39464915	0.000831
ss715586082	3	39510751	0.000481
ss715586086	3	39600402	0.00076
ss715586087	3	39601253	0.000552
ss715586102	3	39759678	0.000494
ss715586112	3	39946374	1.52e-06
ss715586120	3	40006278	6.89e-06
ss715586126	3	40062294	2.7e-06
ss715586168	3	40629683	0.00078
ss715586201	3	41217558	4.24e-05
ss715586203	3	41228895	4.72e-06
ss715586204	3	41236923	7.75e-06
ss715586227	3	41429667	0.000787
ss715586784	3	5120291	0.000251
ss715587135	4	1423044	0.000477
ss715587149	4	1470144	0.000119
ss715588734	4	49624109	0.000904
ss715588735	4	49625196	0.000904
ss715589344	4	8075910	0.000109
ss715589347	4	8089953	5.38e-05
ss715589348	4	8091107	4.65e-05
ss715589349	4	8095691	4.65e-05
ss715590251	5	25961968	0.000866
ss715590255	5	26029139	0.000799
ss715590263	5	26317259	0.000866
ss715590264	5	26328163	0.000576
ss715590266	5	26362820	0.000559
ss715590267	5	26387482	0.00065
ss715590269	5	26446634	0.000646
ss715590274	5	26605887	0.000627
ss715590275	5	26642802	0.000627
ss715590317	5	27611613	0.000196
ss715590327	5	27762168	6.73e-05
ss715590864	5	33444202	0.000758
ss715591082	5	34969363	9.12e-05
ss715591421	5	37361399	0.000843
ss715592677	6	10143832	0.000631
ss715592683	6	10250655	0.000658
ss715592816	6	11732734	0.000806
ss715593430	6	15865285	0.000273
ss715593646	6	16837448	0.000911
ss715593665	6	16966769	0.000748
ss715593670	6	16986423	0.00085
ss715593682	6	17154269	4.12e-05
ss715593685	6	17178147	0.000622
ss715593697	6	17214720	0.000943
ss715593748	6	17439802	0.000231
ss715593752	6	17453327	6.25e-05
ss715593783	6	18068204	0.000215
ss715594575	6	46802305	0.000439
ss715594820	6	47970654	0.000483
ss715595565	6	7916319	0.000611
ss715596985	7	2776621	0.000569
ss715597781	7	38526137	0.000213
ss715598660	7	7690796	0.000522
ss715598755	7	8126683	0.000185
ss715598757	7	8131035	0.000806
ss715598770	7	8192335	0.000328
ss715598771	7	8193257	0.000255
ss715598774	7	8206004	0.000336
ss715598775	7	8215952	0.000846
ss715598787	7	8285881	0.00084
ss715598825	7	8456978	0.000493
ss715599541	8	14196322	1.2e-05
ss715599547	8	14226774	1.54e-06
ss715599553	8	14252039	0.000956
ss715599704	8	15469335	0.000464
ss715599721	8	15633368	0.000337
ss715599724	8	15645356	0.000284
ss715599725	8	15646992	0.000586
ss715600653	8	2141141	0.000818
ss715601548	8	3595331	0.000792
ss715602030	8	42884312	0.000863
ss715602142	8	43973646	0.000989
ss715602146	8	43985433	7.92e-05
ss715602150	8	44017970	0.000191
ss715602153	8	44037907	0.000338
ss715602164	8	44070700	0.000421
ss715602165	8	44084665	0.000487
ss715602166	8	44096773	0.000183
ss715602167	8	44107580	0.000581
ss715602186	8	44202939	0.000158
ss715602188	8	44207069	0.00054
ss715602191	8	44208201	0.000305
ss715602192	8	44211606	0.000306
ss715602193	8	44220481	0.00033
ss715602194	8	44221107	0.000284
ss715602200	8	44260595	0.000305
ss715602219	8	44399565	0.000776
ss715602277	8	45339181	0.000217
ss715602298	8	45170170	0.000538
ss715602301	8	45156593	0.000135
ss715602663	8	7108611	0.000881
ss715602717	8	7862866	0.000188
ss715602721	8	7883227	0.000656
ss715603562	9	3143198	0.000105
ss715603651	9	36155150	0.000531
ss715603892	9	39932586	0.000568
ss715603893	9	39933882	0.000445
ss715603896	9	39947109	0.000874
ss715603914	9	3795710	0.000605
ss715603915	9	40148459	0.000779
ss715603959	9	40376477	0.000344
ss715603964	9	40402692	0.000503
ss715603965	9	40412974	0.000453
ss715603968	9	40418279	0.000703
ss715604017	9	41130494	0.000983
ss715604018	9	41136191	0.000983
ss715604029	9	41193209	0.00013
ss715606784	10	39478220	0.000634
ss715607441	10	44990199	0.000586
ss715607444	10	45002361	0.0005
ss715607446	10	45009425	0.000563
ss715607447	10	45014647	0.000494
ss715607448	10	45015062	0.000563
ss715607449	10	45022163	0.000539
ss715607450	10	45023591	0.000477
ss715607455	10	45110885	0.000998
ss715608194	10	5074022	0.00092
ss715608211	10	5110455	0.00092
ss715608217	10	5119799	0.00092
ss715608221	10	5132513	0.00096
ss715608223	10	5137986	0.00092
ss715608248	10	5334552	0.000854
ss715608259	10	5417068	0.000896
ss715608266	10	5436902	0.000218
ss715608274	10	5441175	0.000219
ss715608276	10	5445289	0.000622
ss715608278	10	5487671	0.000527
ss715608280	10	5495368	0.000273
ss715608285	10	5507476	0.000445
ss715608286	10	5509486	0.000451
ss715608308	10	5592554	0.000201
ss715608381	10	6160752	0.000948
ss715608384	10	6196008	0.000942
ss715608411	10	6315338	0.000322
ss715608455	10	6655121	0.000757
ss715608493	10	7111255	0.000943
ss715609849	11	17871050	0.000227
ss715609873	11	16146461	0.000361
ss715610668	11	421061	0.00039
ss715610770	11	486592	0.00085
ss715610785	11	490999	0.000866
ss715611186	11	8093449	0.000689
ss715611564	12	1536763	0.000523
ss715611568	12	1546067	0.000831
ss715611577	12	1562405	0.000857
ss715612207	12	32720024	0.000981
ss715612567	12	35429338	0.000566
ss715612986	12	39596048	0.000775
ss715613006	12	39736343	0.00014
ss715613060	12	4036537	0.000542
ss715613073	12	4220002	0.000129
ss715613168	12	5395750	0.000449
ss715613169	12	5397280	0.000268
ss715613171	12	5400963	0.000931
ss715613172	12	5409612	0.000267
ss715613175	12	5433032	6.07e-05
ss715613570	12	839940	0.000547
ss715614500	13	27824598	0.000515
ss715614507	13	27864975	0.000334
ss715614683	13	28673573	0.000745
ss715615583	13	34809421	0.000315
ss715615649	13	35677879	0.00019
ss715616535	13	44357080	0.000787
ss715618217	14	33571207	0.000648
ss715619116	14	45526449	0.000708
ss715619174	14	45922211	0.000737
ss715619197	14	4771954	0.000415
ss715619253	14	4795145	0.000529
ss715619272	14	46550370	0.000665
ss715619278	14	46595576	0.000834
ss715621227	15	2021213	0.000647
ss715622653	15	4991877	0.000791
ss715624144	16	29561483	0.000475
ss715624148	16	29575980	0.000506
ss715624152	16	29583982	0.000476
ss715624159	16	29614703	0.000476
ss715624188	16	29820986	0.00031
ss715624481	16	32128738	0.000485
ss715624545	16	32772447	0.00084
ss715624612	16	33587731	0.000675
ss715624876	16	36644936	0.000646
ss715624931	16	37046875	0.000997
ss715625002	16	37660795	1.67e-05
ss715625003	16	37665286	0.000117
ss715625004	16	37673630	0.00013
ss715625007	16	37701598	4.16e-05
ss715625009	16	37712387	8.87e-06
ss715625012	16	37737235	1.94e-05
ss715625013	16	37753573	1.83e-05
ss715625015	16	37765494	0.000722
ss715625017	16	37784014	1.67e-05
ss715626047	17	1333225	0.000959
ss715626154	17	1402651	0.00076
ss715626213	17	1447883	0.000753
ss715626215	17	1452973	0.000492
ss715626222	17	1467401	0.000994
ss715627425	17	38219237	0.000793
ss715627613	17	39342635	0.000358
ss715627621	17	39426610	0.00091
ss715627999	17	4955428	0.000556
ss715628367	17	9319718	0.000854
ss715631354	18	48263550	0.000734
ss715632794	18	8517919	0.000354
ss715634532	19	36968192	0.000188
ss715634881	19	39792095	0.000332
ss715635117	19	41458437	0.000907
ss715635125	19	41574760	0.000791
ss715637005	20	24615630	0.000243
ss715637265	20	304629	0.000143
ss715637890	20	37823932	0.000319
ss715637898	20	37891590	0.000717
ss715637901	20	37896405	0.000977
ss715637903	20	37902812	0.000493
ss715637917	20	38002763	0.000262
ss715637919	20	38022980	0.000297
ss715637922	20	38030407	0.000289
ss715638627	20	45598771	0.000746
ss715638886	20	47302758	0.000744
ss715638914	20	47630049	0.000884
